1 A preprint submitted to *BioRxiv*

2 v1. 26 November 2020

3

4 **Diel dynamics of dissolved organic matter and**  
5 **heterotrophic prokaryotes reveal enhanced**  
6 **growth at the ocean's mesopelagic fish layer**  
7 **during daytime**

8  
9  
10

11 **Xosé Anxelu G. Morán<sup>1\*</sup>, Francisca C. García<sup>1,2</sup>, Anders Røstad<sup>1</sup>, Luis Silva<sup>1</sup>, Najwa Al-Otaibi<sup>1</sup>,**  
12 **Xabier Irigoien<sup>3</sup>, Maria L. Calleja<sup>1,4</sup>**

13

14 <sup>1</sup>King Abdullah University of Science and Technology (KAUST), Red Sea Research Center,  
15 Biological and Environmental Science & Engineering Division, 23955-6900 Thuwal, Saudi Arabia

16 <sup>2</sup>Environment and Sustainability Institute, University of Exeter, TR10 9FE Penryn, United  
17 Kingdom

18 <sup>3</sup>AZTI Tecnalia, 20110 Pasaia, Spain

19 <sup>4</sup>Max Planck Institute for Chemistry, 55128 Mainz, Germany

20

21 \*Corresponding Author. Email: [xelu.moran@kaust.edu.sa](mailto:xelu.moran@kaust.edu.sa)

22 Present address: Instituto Español de Oceanografía, Centro Oceanográfico de Gijón/Xixón,  
23 33212 Gijón/Xixón, Spain

24

25 **ABSTRACT**

26 Contrary to epipelagic waters, where biogeochemical processes closely follow the light and dark  
27 periods, little is known about diel cycles in the ocean's mesopelagic realm. Here, we monitored  
28 the dynamics of dissolved organic matter (DOM) and planktonic heterotrophic prokaryotes  
29 every 2 h for one day at 0 and 550 m (a depth occupied by vertically migrating fish during light  
30 hours) in oligotrophic waters of the central Red Sea. We additionally performed predator-free  
31 seawater incubations of samples collected from the same site both at midnight and at noon.  
32 Comparable in situ variability in microbial biomass and dissolved organic carbon concentration  
33 suggests a diel supply of fresh DOM in both layers. The presence of fish in the mesopelagic zone  
34 during daytime promoted a sustained, longer growth of larger prokaryotic cells. The specific  
35 growth rates were consistently higher in the noon experiments from both depths (surface: 0.34  
36 vs. 0.18 d<sup>-1</sup>, mesopelagic: 0.16 vs. 0.09 d<sup>-1</sup>). Heterotrophic bacteria and archaea in the  
37 mesopelagic fish layer were also more efficient at converting DOM into new biomass. These  
38 results suggest that the ocean's twilight zone receives a consistent diurnal supply of labile DOM  
39 from diel vertical migrating fishes, enabling an unexpectedly active community of heterotrophic  
40 prokaryotes.

41 Planktonic heterotrophic prokaryotes (HP) pertaining to the domains Bacteria and  
42 Archaea rely on labile dissolved organic matter (DOM) for metabolism and growth<sup>1, 2, 3</sup>. In  
43 surface waters, diel cycles in HP biomass and activity have been related to the photosynthetic  
44 activity of phytoplankton<sup>4</sup>, which obviously follows sunlight. Heterotrophic prokaryotes  
45 dependence on DOM derived from planktonic algae<sup>5</sup> was reported to increase offshore, far  
46 from coastal inputs, in temperate and polar ecosystems<sup>6</sup>. Although this relationship, also  
47 known as bacterioplankton-phytoplankton coupling, has been the subject of debate<sup>7,8</sup>, in  
48 regions with low DOM advection (e.g. at permanently stratified sites without anthropogenic or  
49 riverine inputs nearby, such as oligotrophic tropical waters), we might expect strong diel signals  
50 in the response of heterotrophic prokaryotes coupled with the activity of primary producers<sup>9</sup>.  
51 In this regard, the Red Sea offers a unique opportunity to study biogeochemical processes in  
52 oligotrophic ecosystems. With no permanent rivers, the only allochthonous inputs of DOM  
53 come from urban centers such as Suez, Ghardaqa, Jeddah or Port Sudan, coastal macrophytes  
54<sup>10, 11</sup> or dust events<sup>12, 13</sup>.

55 While epipelagic processes driven by primary production are well known<sup>14, 15</sup>, large gaps  
56 in our understanding of the ecology and biogeochemistry of the mesopelagic zone (i.e. waters  
57 between 200 m and 1000 m) remain<sup>16</sup>. In the mesopelagic realm, trophic interactions between  
58 microbes and metazoa have been long neglected. The available studies have focused mostly on  
59 mesozooplankton<sup>17, 18, 19</sup>. However, recent reports on the large biomass contributed to the  
60 ocean's biota by mesopelagic fishes performing diel vertical migration (DVM) suggest they may  
61 also play an important role as rapid vectors of labile organic matter<sup>20, 21</sup>. DVM can affect only a  
62 fraction of individuals from a given population<sup>20</sup>. In the Red Sea, virtually the entire  
63 populations of mesopelagic fish migrate daily between the surface and the so-called deep  
64 scattering layer (DSL) located at 400-650 m in the mesopelagic zone<sup>22, 23</sup>. DVM fishes have been  
65 recently suggested to generate hotspots for heterotrophic prokaryotes, yielding significantly  
66 higher bacterial growth efficiencies compared with shallower layers<sup>24</sup>. An analysis of a 24 h  
67 intensive sampling at the same location has supported the existence of diel inputs of labile  
68 DOM fueling the HP community at the depths occupied by mesopelagic fishes during daytime  
69<sup>25</sup>. Both DOC concentrations and high nucleic acid content (HNA) bacteria and archaea, usually

70 made up of copiotrophic taxa<sup>26, 27</sup> and more active than the low nucleic acid content (LNA)  
71 group<sup>28, 29, 30</sup>, fluctuated as widely in waters below 200 m as in the upper layers. However, for  
72 the hypothesis of the mesopelagic labile DOM hotspots to be true, we should be able to  
73 demonstrate that the presence or absence of fishes in the twilight zone does make a difference.

74 Here, we report on the results of two short-term incubations with water collected from  
75 the epi- and mesopelagic layers (surface and 550 m, respectively) of the central Red Sea at  
76 midnight and at the following midday. After removing protistan grazers and other larger  
77 organisms by filtration, we followed the dynamics of DOM-heterotrophic prokaryotes  
78 interactions for 8 days. In parallel, we conducted a high frequency (every 2 h for a full 24 h  
79 starting at noon) characterization of the same depths focusing on the response of  
80 heterotrophic prokaryotes abundance, cell size and biomass to changes in DOM concentrations  
81 including its fluorescent properties, previously unreported for this basin. The specific objectives  
82 of this study were: i) to assess the diurnal scales of variability in the standing stocks of HP and  
83 DOM in epipelagic and mesopelagic waters of the central Red Sea, and ii) to test for differences  
84 in the specific growth rate, maximum biomass and growth efficiency of HP between nighttime  
85 and daytime in both layers. Our hypothesis is that DOM supplied by DVM fishes in the  
86 mesopelagic zone during the day had a commensurable effect on the above-mentioned  
87 variables.

88

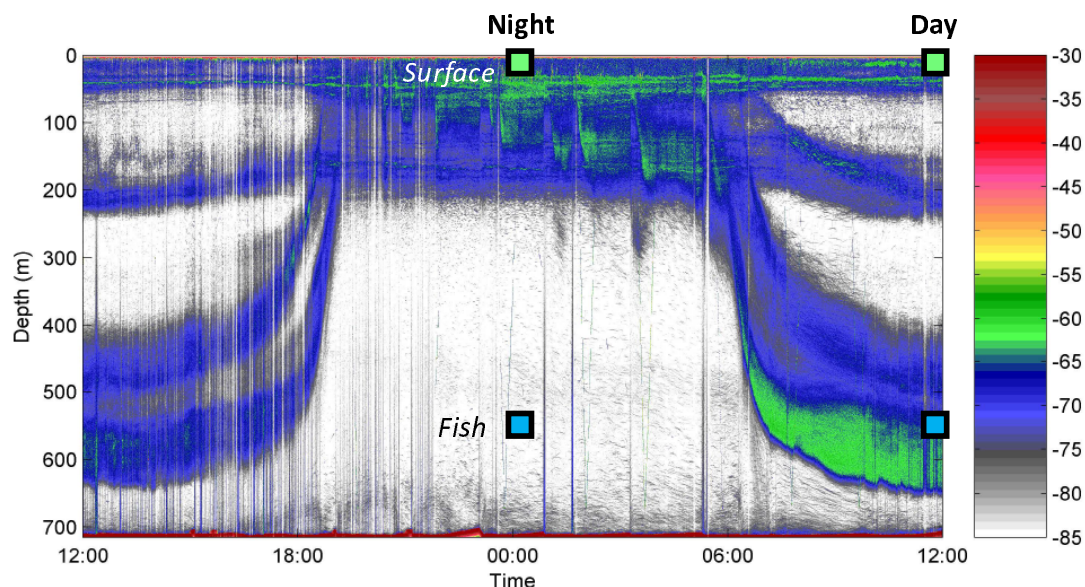

89

90 **Fig. 1.** Echogram from March 5<sup>th</sup> to 6<sup>th</sup> 2016 at the study site showing 2 scattering layers of mesopelagic fish  
91 performing diel vertical migration: up to the surface at night and down to deep waters during daytime. Squares  
92 indicate the depth and time of water collection for the incubation experiments. Surface and mesopelagic (Fish)  
93 depths are represented in green and blue, respectively, for coherence with subsequent figures. Colour scale  
94 indicates backscattering strength ( $S_v$ , dB).  
95

## 96 Results

### 97 Environmental variability of DOC and heterotrophic prokaryotes

98 The complete diel vertical migration of the mesopelagic fishes present at the study site  
99 can be clearly seen in the echogram of **Fig. 1**, with the deeper, more intense layer (dominated  
100 by *Benthosema pterotum*) occupying the depths between ca. 520 and 630 m during daytime on  
101 March 6<sup>th</sup> 2016. **Fig. 2** shows the diel variability of DOC concentrations and the biomass of HP at  
102 the station's surface and 550 m depth. Mean DOC values were almost 50% higher at 0 than at  
103 550 m ( $71.0 \pm 1.6$  SE and  $45.6 \pm 1.5 \mu\text{mol C L}^{-1}$ , respectively). However, both depths showed  
104 similar dynamics, with relative maxima of DOC at noon and also at midnight at the surface (**Fig.**  
105 **2A**) and a slightly higher CV in the fish layer (8.1% vs. 5.7%). The apparent hourly rates of DOC  
106 production (from 8 am to 12 pm at both depths) and consumption (from 12 am to 8 am at the  
107 surface and from 12 pm to 4 pm at 550 m) were similar within each layer: ca.  $1.3 \mu\text{mol C L}^{-1} \text{h}^{-1}$   
108 at the surface and  $2.0 \mu\text{mol C L}^{-1} \text{h}^{-1}$  at the fish layer. Regarding the fluorescent DOM fraction,

109 the protein (Tyrosine)-like component C4 was on average one order of magnitude higher at the  
110 surface than at 550 m, although it showed more variability at depth (Table S1).

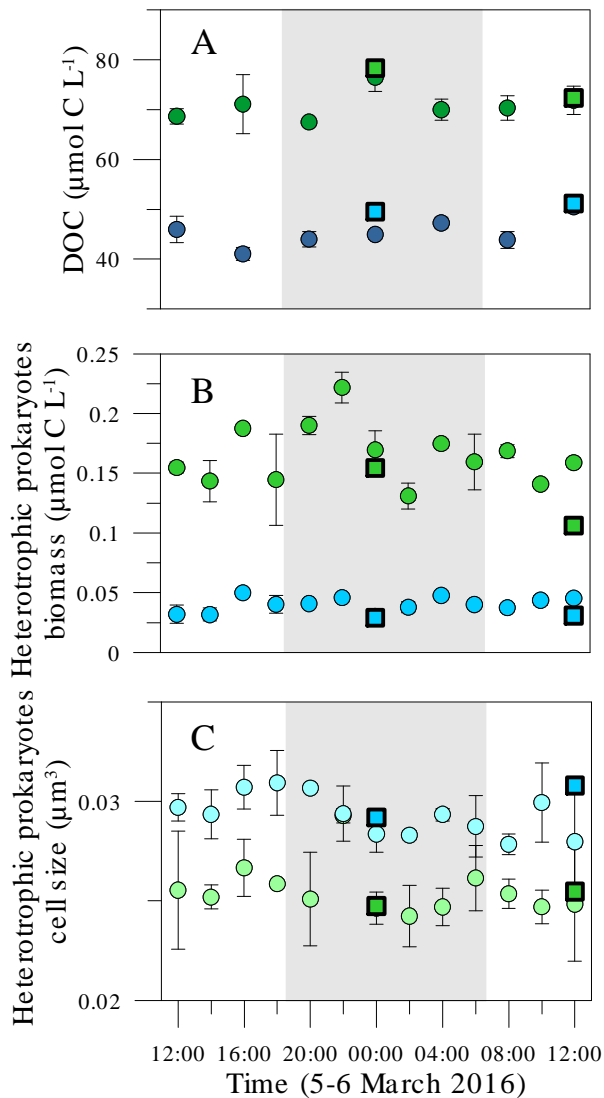

111

112 **Fig. 2.** Variability of mean DOC concentration (A) and heterotrophic prokaryoplankton biomass (B) and cell size (C)  
113 in two layers of the study site: upper (0-25 m) and mesopelagic occupied by fish during daytime (450-600 m)  
114 during the 24 h sampling. Surface and mesopelagic (Fish) depths are represented in green and blue, respectively.  
115 Squares indicate initial values at the onset of the experimental incubations. The gray area represents nighttime  
116 hours at the date of sampling. Error bars represent the standard error of the mean (average of 0 and 25 m in the  
117 upper layer and 450, 550 and 600 m in the mesopelagic one).

118

119 The abundance of HP at the surface (mean  $4.31 \pm 0.17 \times 10^5$  cells  $\text{mL}^{-1}$ ) was also one  
120 order of magnitude higher than at 550 m (mean  $9.43 \pm 0.39 \times 10^4$  cells  $\text{mL}^{-1}$ ), but varied similarly  
121 with no clear diel patterns. Although their size was  $22\% \pm 8\%$  larger in the mesopelagic (mean  
122 values of  $0.034$  and  $0.028 \mu\text{m}^3$  at the fish and surface layers, respectively, Fig. 2C), the

123 corresponding biomass was driven mostly by changes in abundance, averaging  $1.91 \pm 0.09 \mu\text{g C}$   
 124  $\text{L}^{-1}$  at the surface and  $0.50 \pm 0.02 \mu\text{g C L}^{-1}$  at 550 m. **Fig. 2B** (in  $\mu\text{mol C L}^{-1}$  for comparison with  
 125 **Fig. 2C**) shows that HP biomass was equally variable at both layers (CV 16.0 vs. 16.3%). In situ  
 126 apparent or net growth rates based on changes in HP cell size were of 0.15 and 0.10  $\text{d}^{-1}$  at 0 and  
 127 550 m, respectively. These estimated specific growth rates changed cyclically over the 24 h  
 128 cycle, especially at the surface. Two maxima, at 20:00 and 8:00, were found at the surface layer  
 129 while the maximum at 550 m was observed at 16:00 (**Fig. S2**).

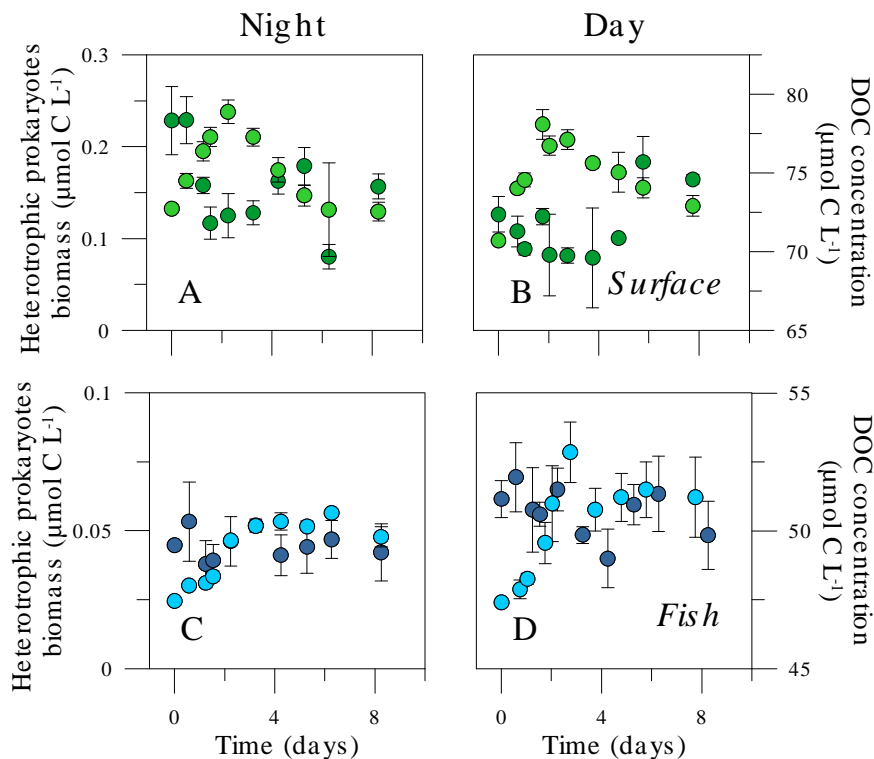

130

131 **Fig. 3.** Dynamics of heterotrophic prokaryoplankton biomass (light colour) and DOC concentration (dark colour) in  
 132 the predator-free experimental incubations of samples taken at noon (**A, C**) and at midnight (**B, D**) from the surface  
 133 and the mesopelagic (Fish, 550 m depth) layers. Note the different scales for surface and mesopelagic water  
 134 experiments. Error bars are standard errors of 3 replicates.

135

136

137

138 **Table 1.** Mean  $\pm$  SE values of specific growth rates ( $\mu$ ), DOC consumption rates or prokaryotic carbon demand  
 139 (PCD, see the text), prokaryotic heterotrophic production rates (PHP) and prokaryotic growth efficiency (PGE) in  
 140 the surface and fish layer incubation experiments performed at noon (Day) and midnight (Night). Rates were  
 141 calculated for each period of exponential growth, also indicated in days. The same period was used for DOC  
 142 consumption and biomass production rates. Also indicated are the maximum heterotrophic prokaryotes biomass  
 143 reached within the incubation and the corresponding ratio of maximum to initial biomass (Max:t0 biomass ratio).

144

| Layer   | Time               | Period (d) | $\mu$ ( $d^{-1}$ ) | DOC consumption rate ( $\mu\text{mol C L}^{-1} d^{-1}$ ) | PHP rate ( $\mu\text{mol C L}^{-1} d^{-1}$ ) | PGE (%) | Maximum HP biomass ( $\mu\text{g C L}^{-1}$ ) | Max:t0 HP biomass ratio |
|---------|--------------------|------------|--------------------|----------------------------------------------------------|----------------------------------------------|---------|-----------------------------------------------|-------------------------|
| Surface | Day                | 0-1.75     | $0.34 \pm 0.07$    | $1.0 \pm 0.5$                                            | $0.040 \pm 0.004$                            | 4.2     | $2.69 \pm 0.20$                               | 2.30                    |
|         | Night <sup>a</sup> | 0-2.25     | $0.18 \pm 0.02$    | $2.7 \pm 1.1$                                            | $0.047 \pm 0.006$                            | 1.8     | $2.85 \pm 0.16$                               | 1.80                    |
| Fish    | Day <sup>a</sup>   | 0-2.75     | $0.16 \pm 0.04$    | $0.5 \pm 0.3$                                            | $0.020 \pm 0.004$                            | 4.2     | $0.94 \pm 0.13$                               | 3.27                    |
|         | Night              | 0-2.25     | $0.09 \pm 0.01$    | $0.3 \pm 0.8$                                            | $0.010 \pm 0.001$                            | 3.1     | $0.68 \pm 0.02$                               | 2.31                    |

145 <sup>a</sup>Vertically migrating mesopelagic fish present

146

147

#### Experimental incubations of surface and deep samples

148

149 With initial concentrations similar to ambient values (**Fig. 2**), DOC was consumed in the  
150 first 2-3 days in the predator-free experiments (**Fig. 3**), albeit at different daily rates (**Table 1**),  
151 followed by net production after day 4 especially in the Surface incubations. Minimum and  
152 maximum consumption rates were  $0.32$  and  $2.69 \mu\text{mol C L}^{-1} d^{-1}$ , found in the Fish and Surface  
153 Night experiments, respectively (FN and SN). Values in the other two experiments carried out  
154 with noon samples were below  $1 \mu\text{mol C L}^{-1} d^{-1}$  ( $0.47$  and  $0.95 \mu\text{mol C L}^{-1} d^{-1}$ , respectively in in  
155 FS and SD). The initial fluorescence intensity values of the component C4 in the experiments  
156 was higher but reflected the values measured concurrently in the water column (paired *t*-test,  
157  $p > 0.05$ ,  $n = 4$ ). C4 showed a very consistent consumption pattern regardless of the layer and  
158 treatment. Heterotrophic prokaryotes in the Surface incubations consumed in 4 days 40 and  
159 50% of the initial values during Night and Day respectively, while bacteria inhabiting deep  
160 waters consumed almost all of it (95-100 %) within the same time frame regardless of the  
161 sampling time (**Fig. 4**). Hereinafter we consider changes in C4 as representative of labile DOM  
162 dynamics. Day and night C4 consumption patterns did not show any significant differences



163 within the same layer but they displayed significantly higher consumption rates in the Fish layer  
164 (ANOVA,  $p=0.004$ , post-hoc Fisher LSD test, **Figure 4** and **Table S1**).

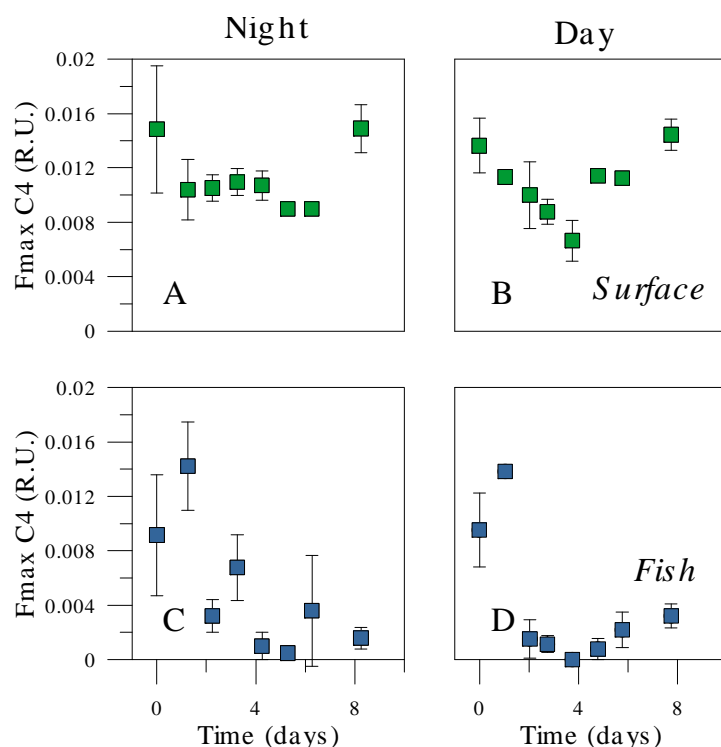

165  
166 **Fig. 4.** Dynamics of the concentration of the FDOM protein-like C4 component in the predator-free experimental  
167 incubations of samples taken at noon (**A**, **C**) and at midnight (**B**, **D**) from the surface and 550 m depth. Error bars  
168 are standard errors of 3 replicates.  
169  
170 Heterotrophic prokaryotes responses in the incubation experiments differed between  
171 depths and sampling times (**Fig. 3**). Consistent differences were found between the specific  
172 growth rates at both depths (**Table 1**), with  $\mu$  being double in the Surface than in the Fish  
173 experiments. Within each layer, the Day  $\mu$  values were also higher than the Night ones (t-tests,  
174  $p=0.020$  and  $p=0.060$  at the Surface and Fish experiment, respectively,  $n=6$ ). HNA cells always  
175 grew faster than their LNA counterparts resulting in increases in their relative contribution from  
176 43-55% to 55-62%, more noticeable in the FD experiment. The mean size of the cells also  
177 increased substantially in the Fish experiments, from  $0.027$  to  $0.060 \mu\text{m}^3$  in the FD incubation  
178 and from  $0.028$  to  $0.047 \mu\text{m}^3$  in the FN one, while changes in cell size were much smaller in the  
179 Surface experiments, and virtually the same in both periods, from  $0.026$  to  $0.037 \mu\text{m}^3$  (SD) and  
180 from  $0.025$  to  $0.035 \mu\text{m}^3$  (SN) (**Fig. S2**). Consequently, cell size played an important role in the

181 increase in biomass, especially in both Fish experiments (**Fig. 3C, D**). The biomass production  
182 rates of heterotrophic prokaryotes for the same periods of DOC consumption ranged 4-fold,  
183 from 0.010 to 0.047  $\mu\text{mol C L}^{-1} \text{d}^{-1}$ , mirroring the changes in the latter variable (**Table 1**). The  
184 rates of heterotrophic prokaryotes biomass production and DOC consumption were used for  
185 estimating prokaryotic growth efficiencies (PGE) in the four experimental incubations. PGE was  
186 uniformly below 5%, ranging from 1.8% (SN) to 4.2% (both SD and FD, **Table 1**). Following the  
187 pattern of in situ values, maximum HP biomass measured in the incubations was higher in the  
188 Surface than in the Fish experiments (**Fig. 3, Table 1**), although the increase ratios (i.e. the ratio  
189 of maximum to initial biomass, **Table 1**) were significantly higher in the Fish experiments with  
190 all data pooled (t-test,  $p=0.048$ ,  $n=12$ ).

191

192

## 193 **Discussion**

### 194 **Diel interactions between DOM and heterotrophic prokaryotes**

195 There is consensus that marine biota biomass and activity peak in the upper layers and  
196 decrease exponentially with depth, following the strong vertical gradients in physico-chemical  
197 properties<sup>31</sup>. Heterotrophic prokaryotes inhabiting the Red Sea seem to challenge this view.  
198 Together with diel variations of standing stocks<sup>25</sup>, this study), night- and day-initiated  
199 incubations of predator-free ambient assemblages with the DOM pool available at the time of  
200 sampling yielded surprising similarities in epipelagic and mesopelagic waters. A method for  
201 estimating division rates in cyanobacteria based in changes in cell size<sup>32, 33</sup> was adapted to  
202 obtain independent estimates of in situ net growth rates (**Fig. S2**). The diel variability in  
203 heterotrophic prokaryotes cell size showed the same pattern at the surface and the  
204 mesopelagic fish layer (**Fig. 2**), yielding low but comparable net growth estimates at the surface  
205 than at 550 m depth (0.10-0.15  $\text{d}^{-1}$ ). However, it must be noted here that the already large  
206 prokaryotes inhabiting the mesopelagic fish layer were able to grow much bigger in the absence  
207 of protistan grazers (**Fig. S1**), confirming the results of a previous study conducted at the same  
208 site<sup>24</sup>.

209           Diel cycles in biogeochemical properties and plankton biomass and activity in the upper  
210 ocean layers are reasonably well known, following diurnal changes in photosynthesis and food  
211 web processes<sup>4,9</sup>. No clear patterns were observed for in situ heterotrophic prokaryotes  
212 abundance or biomass, probably due to strong coupling between growth and mortality due to  
213 protistan grazing<sup>34,35</sup> and/or viral lysis in the Red Sea (E. Sabbagh et al., in prep.), and in  
214 tropical waters in general<sup>36</sup>. However, likewise early observations in the Caribbean<sup>37</sup> recently  
215 confirmed for this site<sup>25</sup>, DOM concentrations displayed a coherent diel pattern suggesting  
216 different timing of production and consumption (**Fig. 1**). Confirming previous experiments<sup>38</sup>,  
217 DOC consistently decreased in the first 2-3 days in both Surface and Fish samples, ranging from  
218 0.7 to 6.1  $\mu\text{mol L}^{-1}$ , followed by net production after day 4 especially in the Surface incubations,  
219 coincident with a sharp decay in prokaryotic biomass (**Fig. 3A, B**). Indeed, the strong apparent  
220 uptake of surface DOC in situ during nighttime coincided with the highest DOC consumption  
221 experimental result, pointing to its labile nature, although the buildup of HP biomass was similar  
222 in both SD and SN experiments, resulting in lower specific growth rates and PGE values in the  
223 Night (**Table 1**). Labile DOC incorporation does not automatically inform us of its subsequent  
224 partitioning between metabolism (respiration) and growth (biomass production), as shown by  
225 Condon et al.<sup>39</sup> for DOM originated by jellyfish blooms. Since the alternation between light and  
226 dark periods within the incubator used for Surface seawater was common for SD and SN  
227 experiments, if photoheterotrophy<sup>40,41</sup> affected DOM dynamics, it should have been equally  
228 apparent in both Night and Day incubations, which were initiated with only 12 h difference (**Fig.**  
229 **1**). We therefore ruled out photoheterotrophic processes explaining the differences observed  
230 after 8 days of incubation. Rather, the quality of labile DOM at midday (including recent  
231 photosynthate) was probably higher than at midnight (perhaps with a greater contribution of  
232 DOM coming from sloppy feeding,<sup>42</sup> causing the significantly higher  $\mu$  values (**Table 1**). That  
233 the quality of labile DOC at noon could have been higher was supported by a faster increase in  
234 bacterial cell size (**Fig. S1B**) and the contribution of HNA cells, which increased by 35% in SD  
235 compared with 15% in SN. The decrease in the protein-like C4 component was also more  
236 sustained in the SD experiment compared to SN after 4 days (13.2% vs. 5.3% was consumed  
237 daily during that period, **Fig. 4**) although the rates were virtually the same in the initial periods

238 (2.75 and 2.25 days, respectively, **Table S1**). Changes in mesopelagic DOC concentrations and  
239 lability at diel (<sup>25</sup>, this study) and seasonal scales <sup>43</sup> in the central Red Sea support the recent  
240 claim that the diverse pool of DOM in the deep ocean fluctuates at timescales much shorter  
241 than previously thought <sup>44</sup>. Since the conditions at the study site were hypoxic in most of the  
242 mesopelagic realm <sup>43</sup>, the low in situ oxygen concentrations in the Fish water samples,  
243 consistent from 300 m downwards ( $0.69 \pm 0.03 \text{ mg L}^{-1}$ ) might have been supplemented by pre-  
244 filtration and sampling from the experimental bottles. Although we did not control for this  
245 potential artefact, the same protocol was followed for the FN and FD experiments. Therefore,  
246 the consistently higher values of DOM consumption, prokaryotic cell size, growth rates and  
247 efficiency in the Day compared with the Night incubation strongly support that the presence of  
248 fish indeed had a major impact on the microbial community.

249 Surface specific growth rate in the Day experiment was nevertheless notably higher  
250 than the  $0.08 \text{ d}^{-1}$  measured in a previous study carried out in November 2015 at the same  
251 location <sup>24</sup>. The discrepancy cannot be explained by total DOC or chlorophyll *a* concentrations,  
252 but could instead be related to the availability of labile DOM compounds since C4  
253 concentrations were 61% higher in March than in November (M. L. Calleja, pers. comm.). At a  
254 shallower, nearby site characterized by higher total and labile DOC concentrations, specific  
255 growth rates were still considerably higher, ranging from  $0.79$  to  $1.75 \text{ d}^{-1}$  <sup>35</sup>.

256 The daily rates of apparent DOC production and consumption based on changes in in  
257 situ concentration were virtually the same within each of the two layers compared, indicating  
258 no net accumulation. This is the expected result in oligotrophic regions at the short time scale  
259 of one day <sup>37, 45</sup>. However, these rates were still ca. 50% higher in the mesopelagic zone  
260 resulting in apparent turnover of labile DOC of  $23.6\% \text{ d}^{-1}$  in the mesopelagic compared with  
261  $14.7\% \text{ d}^{-1}$  at the surface, if we consider the measured diel variability and maximum  
262 concentrations in each layer. This finding conflicts with the contention that DOM is largely of  
263 refractory nature within the mesopelagic waters of the global ocean <sup>46</sup>. The role of vertically  
264 migrating animals, zooplankton and fishes, as vectors of organic matter to deep layers  
265 complementary to the biological pump <sup>14</sup> has been recently recognized <sup>17, 18, 47</sup>). In this regard,  
266 work at the study site has suggested DVM fishes as a transport mechanism supplying labile

267 DOM that does not accumulate but fuels heterotrophic bacterial activity in mesopelagic waters  
268 <sup>24</sup>. Here we tested this hypothesis by further examining the fluorescence properties of DOM  
269 and its transformation by heterotrophic prokaryotes in experimental incubations with and  
270 without the fishes present. FDOM are useful tracers for biogeochemical processes in the dark  
271 ocean <sup>48, 49</sup>. Fluorescence intensity of the two amino acid-like fluorophores C3 and C4 decreased  
272 with depth (data not shown), indicating that these fluorophores were mainly produced  
273 autochthonously in surface waters. Both phytoplankton and bacteria are sources of tryptophan  
274 and tyrosine <sup>50</sup>, while Urban-Rich et al. <sup>51</sup> have reported that grazing and excretion by  
275 zooplankton can also release material with amino acid-like fluorescence signals. Our results  
276 strongly suggest that DVM fishes can also provide C4 in the mesopelagic realm.

277 Contrary to the epipelagic zone, very few studies on the diel variability of DOM-  
278 heterotrophic prokaryotes interactions are available for deep waters <sup>25, 52</sup>. Gasol et al. <sup>53</sup>  
279 suggested that mesopelagic prokaryotes in the subtropical NE Atlantic were as active as in the  
280 epipelagic. We demonstrate here not only that heterotrophic prokaryotes specific growth rates  
281 at 550 m were of the same order of magnitude than in surface waters, clearly challenging the  
282 most accepted view <sup>31, 54</sup>, but that those rates were almost double at noon conditions, when  
283 the mesopelagic fishes were present, than at midnight, when the entire population was closer  
284 to the surface <sup>22</sup>. From **Fig. 1** it is clear that the fishes were absent at midnight in the entire  
285 mesopelagic zone but their presence at 550 m had been established for ca. 4 h when the noon  
286 sampling took place. Specific growth rates were nevertheless lower than in the previous study  
287 ( $0.24 \text{ d}^{-1}$ , <sup>24</sup>). Although seasonality of C4 in the deep scattering layer was less marked than at  
288 the surface, November 2015 was characterized by 82% higher C4 concentrations than in March  
289 2016 (M. Calleja, pers. comm.). Altogether, these results point out to a major role of protein-  
290 like substances in determining the specific growth rates of heterotrophic prokaryotes  
291 throughout the water column, as recently found for nearby shallow waters in a seasonal study  
292 <sup>35</sup>. C4 fluctuated widely in the 24 h monitoring at 550 m depth (**Table S1**) and was also actively  
293 consumed in all our incubations, thus revealing a clearly labile nature. C4 was consumed faster  
294 in the Fish experiments, at 42.1% and 25.8%  $\text{d}^{-1}$  in FD and FN, respectively (**Fig. 4, Table S1**),  
295 than in the Surface ones (ca. 13%  $\text{d}^{-1}$  in both SD and SN). A similar relative consumption of

296 protein-like FDOM (12% d<sup>-1</sup>), mostly occurring during the first 5 days, was measured by <sup>55</sup> in  
297 experiments conducted with marine surface waters. Our explanation is that fishes released  
298 DOM directly or it leaked from particles associated to the fish presence (e.g. fecal pellets). That  
299 DOM could have been delivered by sinking particles <sup>56</sup> not related to vertical migration would  
300 not explain the difference between the FD and FN experiments.

301 Cell size has been used as an indicator of the activity of heterotrophic prokaryotes <sup>57</sup>.  
302 While in the Surface experiment growing HP cells were only slightly larger than at time 0 (11%  
303 larger size for both the SD and SN experiments), the cell size increase in the Fish experiment  
304 was dramatic, especially in the Day incubations (118% vs. 68% larger, **Fig. S2**). The contribution  
305 of bigger cells to the observed increase in HP biomass is not at all minor: had we used, as in  
306 many studies, a fixed cellular carbon content of 4 fg C cell<sup>-1</sup> (corresponding to the initial mean  
307 cell size of 0.027 μm<sup>3</sup> for the two depths and periods, **Fig. 2C**), maximum HP biomass in **Table 1**  
308 would have become 2.10 (SD), 2.32, (SN), 0.43 (FD) and 0.39 (FN) μg C L<sup>-1</sup>, i.e. between 42 and  
309 54% lower than the actual values for the mesopelagic prokaryotes. We conclude that the  
310 presence of fishes in the mesopelagic zone during daytime resulted in significantly higher  
311 growth rates of markedly larger cells. As a consequence, changes in abundance were  
312 exacerbated when considering biomass units. The maximum biomass of heterotrophic  
313 prokaryotes that could be sustained by extant DOM concentrations was significantly higher  
314 than the initial value in both Fish experiments (**Table 1**). Altogether, these results point out to  
315 substantial inputs of labile DOM during daytime at the mesopelagic fish layer that are rapidly  
316 mobilized by large bacterial taxa. The archaeon *Nitrosopulimus maritimus*, which makes up  
317 much of the heterotrophic prokaryoplankton biomass at these depths <sup>58</sup>, were apparently not  
318 the main responders to these DOM hotspots, since their contribution to total numbers at the  
319 end of a similar incubation dropped from 50% to 3% <sup>24</sup>. The typical size of these  
320 Thaumarchaeota is small <sup>59</sup>, so it is unlikely that they were the dominant groups growing in our  
321 Fish incubations after 2 days (**Fig. S2C, D**). Besides excreting ammonia that boosts its oxidation  
322 by Thaumarchaeota (formerly Chrenarchaeota) <sup>60</sup>, mesopelagic fish thus seem capable to fuel  
323 the metabolism of large, copiotrophic bacteria.

324 Prokaryotic growth efficiencies are typically low in open ocean, oligotrophic  
325 environments<sup>61, 62</sup>. Most of these measurements refer to the epipelagic zone, where  
326 photosynthesis takes place. Here we provide more information from deeper layers, where  
327 export processes are more important. The recently reported low PGE values at this Red Sea site  
328 (1.6-3.4%,<sup>24</sup> are confirmed by this new study, while higher values (2.5-12.8%) were recorded in  
329 a shallow, richer bay located a few km south<sup>35</sup>. Few studies have estimated the vertical  
330 variability in PGE values, but those that have usually depict lower values with depth<sup>62, 63</sup>,  
331 related to the increased presence of refractory DOM compounds<sup>46</sup> or to the higher dilution of  
332 the labile ones<sup>64</sup>. Notably, the estimated growth efficiency of heterotrophic prokaryotes in our  
333 Day experiments was exactly the same in Surface and Fish water (4.2%), which can only be  
334 explained by the existence of labile DOC of similar quality within both layers, resulting from  
335 photosynthesis at the surface and fish-mediated export in the mesopelagic layer. PGE in the  
336 mesopelagic fish layer was significantly higher than at shallower depths in the experiment  
337 conducted at noon in November 2015<sup>24</sup>. However, when averaging our new two estimates, the  
338 mean PGE value at 550 m (3.6%) was still 22% higher than at the surface, strongly supporting  
339 the presence of high quality DOM hotspots<sup>24</sup> in the deep scattering layer.

340 Although this study is limited to a single 24 hour period, it builds on the previously  
341 demonstrated relatively high growth of mesopelagic heterotrophic prokaryotes<sup>24</sup> by comparing  
342 the outcome of deep samples incubations taken only 12 hours apart, at midnight and noon. We  
343 confirm that the Red Sea mesopelagic zone is not a permanently impoverished environment  
344 but subject to daily inputs of labile DOM compounds similarly to the epipelagic layers. This  
345 novel process driven by mesopelagic fishes, which complements other recently discovered  
346 sources of deep organic carbon<sup>14, 65, 66, 67</sup> seems to have been overlooked due to the tight  
347 coupling between the components of microbial food webs<sup>68</sup>. If vertically migrating fishes are  
348 able to fuel an active and distinct community (T. Huete-Stauffer et al., submitted) of  
349 heterotrophic prokaryotes in the mesopelagic layer of the Red Sea, we might expect this fast  
350 DOM flux to be widespread. The mesopelagic Red Sea has an unusually high temperature,  
351 therefore the effect of colder conditions on fish DOM-microbial interactions remain to be  
352 explored. The implications for global biogeochemical cycling would also vary depending on the

353 actual biomass of mesopelagic fishes and the fraction performing DVM<sup>20</sup>, yet its impact may  
354 increase as deep waters warm up<sup>69</sup>. That these small fishes seem able to sustain the microbial  
355 communities inhabiting the twilight zone also may help reconcile current discrepancies  
356 between carbon pools and fluxes in the global ocean.

357

## 358 **METHODS**

359

### 360 **Environmental sampling**

361 We occupied one station located 13.4 km offshore to the north of King Abdullah  
362 Economic City, Saudi Arabia (lat 22.46°N, lon 39.02°E) between midday March 6<sup>th</sup> and midday  
363 March 7<sup>th</sup>, 2016<sup>24, 25</sup>. In situ monitoring and sampling was conducted on board of RV Thuwal.  
364 Continuous acoustic measurements in order to locate the position of the vertically migrating  
365 mesopelagic fishes were recorded with a Simrad EK60 38 kHz echosounder mounted on the  
366 ship's hull. From noon on March 6<sup>th</sup> until the same time on the following day we conducted CTD  
367 casts every 2 hours. At each cast we sampled discrete depths in the water column with Niskin  
368 bottles mounted on a Rosette sampler, ranging from the surface to 650 m depth. Water filtered  
369 through pre-combusted Whatman GF/F filters was collected for analyzing DOC bulk  
370 concentrations and fluorescent DOM (FDOM) properties (40 mL pre-combusted glass vials).  
371 Unfiltered water was collected for characterizing the community of heterotrophic prokaryotes  
372 (2 mL cryovials).

373 Hourly in situ apparent DOC production and consumption rates were estimated as the  
374 largest difference between DOC concentration in consecutive sampling times that showed a  
375 consistently increasing and decreasing trend, respectively. The same approach was used for  
376 estimating the apparent biomass production of heterotrophic prokaryotes over the diel cycle.

377

### 378 **Experimental incubations**

379 10 L of seawater from the surface and 550 m depth were collected in the midnight and  
380 noon casts on March 7<sup>th</sup> for conducting the experimental incubations of DOC consumption,  
381 change in FDOM and heterotrophic prokaryotes biomass response. In order of remove  
382 protistan grazers and planktonic organisms larger than bacteria and archaea, water was gently



383 filtered through pre-combusted Whatman GF/C filters (142 mm, nominal pore size 1.2  $\mu\text{m}$ ) and  
384 used to fill 3 x 2 L acid-cleaned polycarbonate bottles, which were subsequently incubated at  
385 the in situ temperature and light regimes (darkness for 550 m samples), so that the possible  
386 role of photoheterotrophs in the processing of DOM was included. Removal of heterotrophic  
387 prokaryotic cells by filtration was minor (83%  $\pm$  7% SE of the initial abundance was retrieved in  
388 the water used for the incubations) and mean cell size was virtually unaffected (2.6%  $\pm$  1.0%  
389 smaller biovolume than in the unfiltered water). However, filtration eliminated most  
390 *Synechococcus* and *Prochlorococcus* cyanobacteria as well as virtually all the larger protistan  
391 grazers of heterotrophic prokaryotes, since the mean abundance of heterotrophic  
392 nanoflagellates in the GF/C filtrate was 1.5% (E. I. Sabbagh, pers. comm.). We are therefore  
393 confident that no extra sources of DOM were included in our experiments. Subsamples were  
394 taken twice per day on the first 2 days, then daily until day 6 and finally at day 8. DOC and  
395 FDOM subsamples from the incubations were gravity-filtered through pre-rinsed 0.2 Millipore  
396 polycarbonate filters. We will occasionally use the codes S and F to refer to the incubations  
397 made with water from the Surface (0 m) and the Fish layer (550 m), respectively, followed by D  
398 or N to refer to the period of sampling (Day or Night): SD, SN, FD, FN.

399

#### 400 **DOC analysis**

401 Samples for DOC were acidified with  $\text{H}_3\text{PO}_4$  and kept in the dark at 4 °C until analysis by  
402 high temperature catalytic oxidation at the laboratory. All glass material used was acid cleaned  
403 and burned (450°C, 4.5 h). Consensus reference material of deep sea carbon (42–45  $\mu\text{mol C L}^{-1}$   
404 and 31–33  $\mu\text{mol N L}^{-1}$ ) and low carbon water (1–2  $\mu\text{mol C L}^{-1}$ ), provided by D. A. Hansell and W.  
405 Chen (Univ. of Miami) was used to monitor the accuracy of our DOC concentration  
406 measurements. The analytical error of DOC concentration was 1.4  $\mu\text{mol L}^{-1}$ .

407

#### 408 **DOM fluorescence measurements and PARAFAC modeling**

409 FDOM samples were stored at 4°C before being analyzed (within 2 days after the  
410 completion of the cruise and incubation sample collection). UV-VIS fluorescence spectroscopy  
411 was measured using a HORIBA Jobin Yvon AquaLog spectrofluorometer with a 1 cm path length

412 quartz cuvette. Three dimensional fluorescence excitation emission matrices (EEMs) were  
413 recorded by scanning with an excitation wavelength range of 240- 600 nm and emission of 250-  
414 600 nm, both at 3 nm increments and integrating at 8 seconds. To correct and calibrate the  
415 fluorescence spectra post-processing steps were followed according to Murphy et al. <sup>70</sup>. Briefly,  
416 fluorescence spectra were Raman area (RA) normalized by subtracting daily blanks that were  
417 performed using Ultra-Pure Milli-Q sealed water (Certified Reference, Starna Cells). Inner-filter  
418 correction (IFC) was also applied according to McKnight et al. (2001) RA normalization, blank  
419 subtraction, IFC and generation of EEMs were performed using MATLAB (version R2015b).

420 A total of 165 samples for DOM fluorescence were collected (81 from 7 vertical profiles  
421 and 84 from the experimental incubations). The EEMs obtained were subjected to PARAFAC  
422 modeling using DOMFluor Toolbox <sup>71</sup>. Before the analysis, Rayleigh scatter bands were  
423 trimmed. A four-component model was validated using split-half validation and random  
424 initialization <sup>71</sup>: peak C1 at Ex/Em 240(325)/ 407 nm, peak C2 at Ex/Em 258(390)/492 nm, peak  
425 C3 at Ex/Em 240/337 and peak C4 at Ex/Em 276/312 nm. C1 corresponds to peak M <sup>72</sup> and is  
426 comparable to component 2 identified by Català et al. <sup>49</sup>. C2 represents a combination of peaks  
427 A and C <sup>72</sup> and is comparable to component 1 in <sup>49</sup>. C3 corresponds to peak T <sup>72</sup>, attributed to  
428 tryptophane, and is comparable to component 3 in <sup>49</sup>. C4 corresponds to peak B <sup>72</sup>, attributed  
429 to tyrosine, and is comparable to component 4 in <sup>49</sup>. The maximum fluorescence (Fmax) is  
430 reported in Raman units (RU).

431

### 432 **Heterotrophic prokaryotes abundance and biomass**

433 Triplicate samples (1.8 mL) for estimating the abundance of heterotrophic bacteria and  
434 archaea in situ and in the experimental incubations were fixed with 1% paraformaldehyde and  
435 0.05% glutaraldehyde, deep frozen in liquid nitrogen and stored at -80°C until analysis. Once  
436 thawed, 400 µL aliquots were stained with SYBR-Green run in a BD FACSCanto II flow cytometer  
437 for estimating the abundance of low (LNA) and high (HNA) nucleic acid content cells as detailed  
438 in Gasol and Morán <sup>73</sup>. The few cyanobacteria present were easily distinguished in the surface  
439 samples due to their autofluorescence red signal because of the presence of chlorophyll *a*.  
440 Absolute abundances were estimated based on time and the actual flow rates, which were

441 calibrated daily using the gravimetric method. The right angle light scatter or side scatter (SSC)  
442 signal relative to the value of 1  $\mu\text{m}$  fluorescent latex beads added to each sample was used to  
443 estimate the cell diameter according to Calvo-Díaz and Morán<sup>74</sup>. LNA and HNA cell numbers  
444 were summed to estimate the total abundance and their specific cell sizes averaged to obtain  
445 the mean cell size of the heterotrophic prokaryote community at both depths and different  
446 times. Assuming spherical shape, the mean cell size (biovolume in  $\mu\text{m}^3$ ) was converted into  
447 cellular carbon content following Gundersen et al.<sup>75</sup>. Heterotrophic prokaryotes biomass was  
448 then calculated as the product of cell abundance and mean cellular carbon content.

449

#### 450 **Growth rate estimates**

451 In situ apparent or net growth rates of the heterotrophic prokaryote assemblage at the  
452 surface and the mesopelagic fish layer were estimated from changes in biomass ( $\mu\text{g C L}^{-1}$ )  
453 resulting from changes in abundance and mean cell size over 24 h. Net growth rates ( $\mu$ , in units  
454  $\text{h}^{-1}$ ) were calculated as:

455

$$456 \quad \mu = \ln (N_1/N_0) / \Delta t \quad (1)$$

457

458 where  $N_1$  is the final biomass,  $N_0$  is the initial biomass and  $\Delta t$  is the time interval (2 h).

459 We modeled the overall daily growth rate from Eq. (1) using the size distribution of the  
460 organisms with the R package *ssPopModel*, which included a modified version of the size-  
461 structured matrix population model originally developed by Sosik et al.<sup>32</sup>. Matrix population  
462 model assumption is that changes in size distribution are only related to growth and division of  
463 the cells. We adapted and simplified the application of this function as described by Hunter-  
464 Cevera et al.<sup>33</sup> for *Synechococcus* cyanobacteria to be used with heterotrophic prokaryote cells.

465 Specific growth rates in the incubations were calculated as the slope of the ln-  
466 transformed total abundance vs. time for the linear response period, equivalent to the phase of  
467 exponential growth (usually lasting between 2 and 3 days).

468

#### 469 **Prokaryotic growth efficiency**

470 Prokaryote heterotrophic production (PHP) in the midnight and midday incubations was  
471 estimated as the rate of increase in bacterial biomass during the exponential phase of growth.  
472 Prokaryotic carbon demand (PCD, i.e. the sum of heterotrophic prokaryotes production and  
473 respiration) was approached by the consumption rate of DOC during the same period.  
474 Prokaryotic growth efficiency (PGE) was therefore calculated as the ratio of PHP to PCD.

475

#### 476 **Statistical analyses**

477 Model I or ordinary least squares (OLS) linear regressions for estimating specific growth  
478 rates were done separately for each replicate, using a common period for each experiment.  
479 Differences between treatments and/or depths were assessed with one way ANOVAs and  
480 Fisher least significance (LSD) post-hoc tests. General relationships between variables were  
481 represented by Pearson's correlation coefficients. Statistical analyses were done with JMP and  
482 STATISTICA software packages.

483

#### 484 **ACKNOWLEDGMENTS**

485 We are greatly indebted to the crew of RV Thuwal and the rest of the personnel from  
486 the Coastal and Marine Resources (CMOR) Core Lab at KAUST for their assistance during field  
487 work. Besides participating in the sample collection M. Viegas helped us with the rest of the  
488 work in the Red Sea Research Center (RSRC) lab. We are also grateful to past and current  
489 members of the Microbial Oceanography and Biogeochemistry lab at the RSRC.

490 X.A.G.M. conceived the research, led the experiment design, data analysis and wrote  
491 the paper. F.C.G. modeled in situ growth rates. A.R. performed the acoustic research. L.S. and  
492 N. A-O. analyzed the heterotrophic prokaryotes. X.I. contributed to the interpretation of results.  
493 M.L.C. was responsible for DOC and FDOM measurements, contributed to experimental design  
494 and data analysis. F.C.G., A.R., X.I. and M.L.C. also contributed to writing.

495

#### 496 **Competing interests**

497 The authors declare that they have no financial or non-financial competing interests.

498

499 **REFERENCES**

- 500
- 501 1. Carlson CA, Ducklow HW, Michaels AF. Annual flux of dissolved organic carbon from the  
502 euphotic zone in the northwestern Sargasso Sea. *Nature* 1994, **371**: 405-408.  
503
- 504 2. Pomeroy LR, Williams PJI, Azam F, Hobbie JE. The Microbial Loop. *Oceanography* 2007,  
505 **20**(2): 28-33.  
506
- 507 3. Goldman JC, Dennett MR. Growth of marine bacteria in batch and continuous culture  
508 under carbon and nitrogen limitation. *Limnol Oceanogr* 2000, **45**(4): 789-800.  
509
- 510 4. Gasol JM, Doval MD, Pinhassi J, Calderón-Paz JI, Guixa-Boixareu N, Vaqué D, *et al.* Diel  
511 variations in bacterial heterotrophic activity and growth in the northwestern  
512 Mediterranean Sea. *Mar Ecol Prog Ser* 1998, **164**: 107-124.  
513
- 514 5. Baines SB, Pace ML. The production of dissolved organic matter by phytoplankton and  
515 its importance to bacteria: Patterns across marine and freshwater systems. *Limnol*  
516 *Oceanogr* 1991, **36** (6): 1078-1090.  
517
- 518 6. Morán XAG, Gasol JM, Pedrós-Alió C, Estrada M. Dissolved and particulate primary  
519 production and bacterial production in offshore Antarctic waters during austral summer:  
520 coupled or uncoupled? *Marine Ecology-Progress Series* 2001, **222**: 25-39.  
521
- 522 7. Fouilland E, Mostajir B. Revisited phytoplanktonic carbon dependency of heterotrophic  
523 bacteria in freshwaters, transitional, coastal and oceanic waters. *FEMS Microbiology*  
524 *Ecology* 2010, **73**(3): 419-429.  
525
- 526 8. Morán XAG, Alonso-Sáez L. Independence of bacteria on phytoplankton? Insufficient  
527 support for Fouilland & Mostajir's (2010) suggested new concept. *Fems Microbiology*  
528 *Ecology* 2011, **78**(2): 203-205.  
529
- 530 9. Ruiz-González C, Lefort T, Massana R, Simó R, Gasol JM. Diel changes in bulk and single-  
531 cell bacterial heterotrophic activity in winter surface waters of the northwestern  
532 Mediterranean Sea. *Limnol Oceanogr* 2012, **57**(1): 29-42.  
533
- 534 10. Duarte CM, Cebrián J. The fate of marine autotrophic production. *Limnol Oceanogr*  
535 1996, **41**(8): 1758-1766.  
536
- 537 11. Alongi DM, Mukhopadhyay SK. Contribution of mangroves to coastal carbon cycling in  
538 low latitude seas. *Agr Forest Meteorol* 2015, **213**: 266-272.  
539
- 540 12. Lekunberri I, Lefort T, Romero E, Vazquez-Dominguez E, Romera-Castillo C, Marrase C, *et*  
541 *al.* Effects of a dust deposition event on coastal marine microbial abundance and

- 542 activity, bacterial community structure and ecosystem function. *J Plankton Res* 2010,  
543 **32**(4): 381-396.
- 544
- 545 13. Bao HY, Niggemann J, Luo L, Dittmar T, Kao SJ. Molecular composition and origin of  
546 water-soluble organic matter in marine aerosols in the Pacific off China. *Atmos Environ*  
547 2018, **191**: 27-35.
- 548
- 549 14. Herndl GJ, Reinthaler T. Microbial control of the dark end of the biological pump. *Nat*  
550 *Geosci* 2013, **6**(9): 718-724.
- 551
- 552 15. Henson SA, Sanders R, Madsen E. Global patterns in efficiency of particulate organic  
553 carbon export and transfer to the deep ocean. *Global Biogeochem Cy* 2012, **26**.
- 554
- 555 16. Robinson C, Steinberg DK, Anderson TR, Aristegui J, Carlson CA, Frost JR, *et al.*  
556 Mesopelagic zone ecology and biogeochemistry - a synthesis. *Deep-Sea Res Pt II* 2010,  
557 **57**(16): 1504-1518.
- 558
- 559 17. Bianchi D, Stock C, Galbraith ED, Sarmiento JL. Diel vertical migration: Ecological controls  
560 and impacts on the biological pump in a one-dimensional ocean model. *Global*  
561 *Biogeochem Cy* 2013, **27**(2): 478-491.
- 562
- 563 18. Isla A, Scharek R, Latasa M. Zooplankton diel vertical migration and contribution to deep  
564 active carbon flux in the NW Mediterranean. *Journal of Marine Systems* 2015, **143**: 86-  
565 97.
- 566
- 567 19. Al-Mutairi H, Landry MR. Active export of carbon and nitrogen at Station ALOHA by diel  
568 migrant zooplankton. *Deep-Sea Res Pt II* 2001, **48**(8-9): 2083-2103.
- 569
- 570 20. Klevjer TA, Irigoien X, Rostad A, Fraile-Nuez E, Benitez-Barrios VM, Kaartvedt S. Large  
571 scale patterns in vertical distribution and behaviour of mesopelagic scattering layers. *Sci*  
572 *Rep-Uk* 2016, **6**.
- 573
- 574 21. Irigoien X, Klevjer TA, Rostad A, Martinez U, Boyra G, Acuña JL, *et al.* Large mesopelagic  
575 fishes biomass and trophic efficiency in the open ocean. *Nat Commun* 2014, **5**.
- 576
- 577 22. Klevjer TA, Torres DJ, Kaartvedt S. Distribution and diel vertical movements of  
578 mesopelagic scattering layers in the Red Sea. *Mar Biol* 2012, **159**(8): 1833-1841.
- 579
- 580 23. Røstad A, Kaartvedt S, Aksnes DL. Light comfort zones of mesopelagic acoustic  
581 scattering layers in two contrasting optical environments. *Deep-Sea Research Part I-*  
582 *Oceanographic Research Papers* 2016, **113**: 1-6.
- 583

- 584 24. Calleja ML, Ansari MI, Røstad A, Silva L, Kaartvedt S, Irigoien X, *et al.* The Mesopelagic  
585 Scattering Layer: A Hotspot for Heterotrophic Prokaryotes in the Red Sea Twilight Zone.  
586 *Front Mar Sci* 2018, **5**: 259.  
587
- 588 25. García FC, Calleja ML, Al-Otaibi N, Røstad A, Morán XAG. Diel dynamics and coupling of  
589 heterotrophic prokaryotes and dissolved organic matter in epipelagic and mesopelagic  
590 waters of the central Red Sea. *Environ Microbiol* 2018, **20**(8): 2990-3000.  
591
- 592 26. Vila-Costa M, Gasol JM, Sharma S, Moran MA. Community analysis of high- and low-  
593 nucleic acid-containing bacteria in NW Mediterranean coastal waters using 16S rDNA  
594 pyrosequencing. *Environ Microbiol* 2012, **14**(6): 1390-1402.  
595
- 596 27. Schattner M, Wulf J, Kostadinov I, Glockner FO, Zubkov MV, Fuchs BM. Phylogenetic  
597 characterisation of picoplanktonic populations with high and low nucleic acid content in  
598 the North Atlantic Ocean. *Systematic and Applied Microbiology* 2011, **34**(6): 470-475.  
599
- 600 28. Gasol JM, Zweifel UL, Peters F, Fuhrman JA, Hagström Å. Significance of size and nucleic  
601 acid content heterogeneity as measured by flow cytometry in natural planktonic  
602 bacteria. *Appl Environ Microbiol* 1999, **65**: 4475-4483.  
603
- 604 29. Bouvier T, del Giorgio PA, Gasol JM. A comparative study of the cytometric  
605 characteristics of High and Low nucleic-acid bacterioplankton cells from different  
606 aquatic ecosystems. *Environmental Microbiology* 2007, **9**(8): 2050-2066.  
607
- 608 30. Morán XAG, Ducklow HW, Erickson M. Single-cell physiological structure and growth  
609 rates of heterotrophic bacteria in a temperate estuary (Waquoit Bay, Massachusetts).  
610 *Limnol Oceanogr* 2011, **2011**(56): 37-48.  
611
- 612 31. Arístegui J, Gasol JM, Duarte CM, Herndl GJ. Microbial oceanography of the dark ocean's  
613 pelagic realm. *Limnol Oceanogr* 2009, **54**(5): 1501-1529.  
614
- 615 32. Sosik HM, Olson RJ, Neubert MG, Shalapyonok A, Solow AR. Growth rates of coastal  
616 phytoplankton from time-series measurements with a submersible flow cytometer.  
617 *Limnol Oceanogr* 2003, **48**(5): 1756-1765.  
618
- 619 33. Hunter-Cevera KR, Neubert MG, Solow AR, Olson RJ, Shalapyonok A, Sosik HM. Diel size  
620 distributions reveal seasonal growth dynamics of a coastal phytoplankton. *P Natl Acad  
621 Sci USA* 2014, **111**(27): 9852-9857.  
622
- 623 34. Calbet A, Agersted MD, Kaartvedt S, Møhl M, Møller EF, Enghoff-Poulsen S, *et al.*  
624 Heterogeneous distribution of plankton within the mixed layer and its implications for  
625 bloom formation in tropical seas. *Sci Rep-Uk* 2015, **5**.  
626

- 627 35. Silva L, Calleja ML, Huete-Stauffer TM, Ivetic S, Ansari MI, Viegas M, *et al.* Low  
628 abundances but high growth rates of heterotrophic bacteria in the coastal Red Sea.  
629 *Front Microbiol*, **submitted**.  
630
- 631 36. Morán XAG, Gasol JM, Pernice MC, Mangot JF, Massana R, Lara E, *et al.* Temperature  
632 regulation of marine heterotrophic prokaryotes increases latitudinally as a breach  
633 between bottom-up and top-down controls. *Global Change Biol* 2017, **23**(9): 3956-3964.  
634
- 635 37. Johnson KM, Burney CM, Sieburth JM. Enigmatic marine ecosystem metabolism  
636 measured by direct diel Sigma-CO<sub>2</sub> and O<sub>2</sub> flux in conjunction with DOC release and  
637 uptake. *Mar Biol* 1981, **65**(1): 49-60.  
638
- 639 38. Calleja ML, Ansari MI, Rostad A, Silva L, Kaartvedt S, Irigoien X, *et al.* The Mesopelagic  
640 Scattering Layer: A Hotspot for Heterotrophic Prokaryotes in the Red Sea Twilight Zone.  
641 *Front Mar Sci* 2018, **5**.  
642
- 643 39. Condon RH, Steinberg DK, del Giorgio PA, Bouvier TC, Bronk DA, Graham WM, *et al.*  
644 Jellyfish blooms result in a major microbial respiratory sink of carbon in marine systems.  
645 *P Natl Acad Sci USA* 2011, **108**(25): 10225-10230.  
646
- 647 40. Béjà O, Aravind L, Koonin EV, Suzuki MT, Hadd A, Nguyen LP, *et al.* Bacterial rhodopsin:  
648 evidence for a new type of phototrophy in the sea. *Science* 2000, **289**: 1902-1906.  
649
- 650 41. Ruiz-González C, Simó R, Sommaruga R, Gasol JM. Away from darkness: a review on the  
651 effects of solar radiation on heterotrophic bacterioplankton activity. *Front Microbiol*  
652 2013, **4**.  
653
- 654 42. Nagata T. Production mechanisms of dissolved organic matter. In: Kirchman DL (ed).  
655 *Microbial ecology of the oceans*. Wiley-Liss: New York, 2000, pp 121-152.  
656
- 657 43. Calleja ML, Al-Otaibi N, Morán XAG. Dissolved organic carbon contribution to oxygen  
658 respiration in the central Red Sea. *Sci Rep-Uk* 2019, **9**: 4690.  
659
- 660 44. Follett CL, Repeta DJ, Rothman DH, Xu L, Santinelli C. Hidden cycle of dissolved organic  
661 carbon in the deep ocean. *P Natl Acad Sci USA* 2014, **111**(47): 16706-16711.  
662
- 663 45. Wright RT. Dynamics of pools of dissolved organic carbon. In: Hobbie JE, Williams PJIB  
664 (eds). *Heterotrophic activity in the sea*. Plenum Press: New York, 1984, pp 121-155.  
665
- 666 46. Jiao N, Herndl GJ, Hansell DA, Benner R, Kattner G, Wilhelm SW, *et al.* Microbial  
667 production of recalcitrant dissolved organic matter: long-term carbon storage in the  
668 global ocean. *Nat Rev Microbiol* 2010, **8**(8): 593-599.  
669



- 670 47. Bianchi D, Galbraith ED, Carozza DA, Mislán KAS, Stock CA. Intensification of open-ocean  
671 oxygen depletion by vertically migrating animals. *Nat Geosci* 2013, **6**(7): 545-548.  
672
- 673 48. Nelson NB, Siegel DA. The Global Distribution and Dynamics of Chromophoric Dissolved  
674 Organic Matter. *Annual Review of Marine Science, Vol 5* 2013, **5**: 447-476.  
675
- 676 49. Catalá TS, Reche I, Fuentes-Lema A, Romera-Castillo C, Nieto-Cid M, Ortega-Retuerta E,  
677 *et al.* Turnover time of fluorescent dissolved organic matter in the dark global ocean.  
678 *Nat Commun* 2015, **6**: 5986.  
679
- 680 50. Determann S, Lobbes JM, Reuter R, Rullkotter J. Ultraviolet fluorescence excitation and  
681 emission spectroscopy of marine algae and bacteria. *Mar Chem* 1998, **62**(1-2): 137-156.  
682
- 683 51. Urban-Rich J, McCarty JT, Fernandez D, Acuna JL. Larvaceans and copepods excrete  
684 fluorescent dissolved organic matter (FDOM). *J Exp Mar Biol Ecol* 2006, **332**(1): 96-105.  
685
- 686 52. Carlucci AF, Craven DB, Robertson KJ, Henrichs SM. Microheterotrophic Utilization of  
687 Dissolved Free Amino-Acids in Depth Profiles of Southern-California Borderland Basin  
688 Waters. *Oceanol Acta* 1986, **9**(1): 89-96.  
689
- 690 53. Gasol JM, Alonso-Saez L, Vaque D, Baltar F, Calleja ML, Duarte CM, *et al.* Mesopelagic  
691 prokaryotic bulk and single-cell heterotrophic activity and community composition in  
692 the NW Africa-Canary Islands coastal-transition zone. *Prog Oceanogr* 2009, **83**(1-4): 189-  
693 196.  
694
- 695 54. Baltar F, Arístegui J, Gasol JM, Herndl GJ. Prokaryotic carbon utilization in the dark  
696 ocean: growth efficiency, leucine-to-carbon conversion factors, and their relation. *Aquat  
697 Microb Ecol* 2010, **60**(3): 227-232.  
698
- 699 55. Yamashita Y, Tanoue E. In situ production of chromophoric dissolved organic matter in  
700 coastal environments. *Geophys Res Lett* 2004, **31**(14).  
701
- 702 56. Smith DC, Simon M, Alldredge AL, Azam F. Intense Hydrolytic Enzyme-Activity on Marine  
703 Aggregates and Implications for Rapid Particle Dissolution. *Nature* 1992, **359**(6391): 139-  
704 142.  
705
- 706 57. Gasol JM, del Giorgio PA, Massana R, Duarte CM. Active versus inactive bacteria: size-  
707 dependence in coastal marine plankton community. *Mar Ecol Prog Ser* 1995, **128**: 91-97.  
708
- 709 58. Ngugi DK, Antunes A, Brune A, Stingl U. Biogeography of pelagic bacterioplankton across  
710 an antagonistic temperature-salinity gradient in the Red Sea. *Mol Ecol* 2012, **21**(2): 388-  
711 405.  
712

- 713 59. Konneke M, Bernhard AE, de la Torre JR, Walker CB, Waterbury JB, Stahl DA. Isolation of  
714 an autotrophic ammonia-oxidizing marine archaeon. *Nature* 2005, **437**(7058): 543-546.  
715
- 716 60. Bianchi D, Babbín AR, Galbraith ED. Enhancement of anammox by the excretion of diel  
717 vertical migrators. *P Natl Acad Sci USA* 2014, **111**(44): 15653-15658.  
718
- 719 61. del Giorgio PA, Cole JJ. Bacterial growth efficiency in natural aquatic systems. *Ann Rev*  
720 *Ecol Syst* 1998, **29**: 503-541.  
721
- 722 62. Reinthaler T, van Aken H, Veth C, Arístegui J, Robinson C, Williams PJLR, *et al.*  
723 Prokaryotic respiration and production in the meso- and bathypelagic realm of the  
724 eastern and western North Atlantic basin. *Limnology and Oceanography* 2006, **51**(3):  
725 1262-1273.  
726
- 727 63. Lemée R, Rochelle-Newall E, Van Wambeke F, Pizay MD, Rinaldi P, Gattuso JP. Seasonal  
728 variation of bacterial production, respiration and growth efficiency in the open NW  
729 Mediterranean Sea. *Aquatic Microbial Ecology* 2002, **29**(3): 227-237.  
730
- 731 64. Arrieta JM, Mayol E, Hansman RL, Herndl GJ, Dittmar T, Duarte CM. Dilution limits  
732 dissolved organic carbon utilization in the deep ocean. *Science* 2015, **348**(6232): 331-  
733 333.  
734
- 735 65. Dall'Olmo G, Dingle J, Polimene L, Brewin RJW, Claustre H. Substantial energy input to  
736 the mesopelagic ecosystem from the seasonal mixed-layer pump. *Nat Geosci* 2016,  
737 **9**(11): 820+.  
738
- 739 66. Giering SLC, Sanders R, Lampitt RS, Anderson TR, Tamburini C, Boutrif M, *et al.*  
740 Reconciliation of the carbon budget in the ocean's twilight zone. *Nature* 2014,  
741 **507**(7493): 480+.  
742
- 743 67. Boeuf D, Edwards BR, Eppley JM, Hu SK, Poff KE, Romano AE, *et al.* Biological  
744 composition and microbial dynamics of sinking particulate organic matter at abyssal  
745 depths in the oligotrophic open ocean. *P Natl Acad Sci USA* 2019, **in press**.  
746
- 747 68. Pernthaler J. Predation on prokaryotes in the water column and its ecological  
748 implications. *Nat Rev Microbiol* 2005, **3**(7): 537-546.  
749
- 750 69. Luna GM, Bianchelli S, Decembrini F, De Domenico E, Danovaro R, Dell'Anno A. The dark  
751 portion of the Mediterranean Sea is a bioreactor of organic matter cycling. *Global*  
752 *Biogeochem Cy* 2012, **26**.  
753
- 754 70. Murphy KR, Butler KD, Spencer RGM, Stedmon CA, Boehme JR, Aiken GR. Measurement  
755 of Dissolved Organic Matter Fluorescence in Aquatic Environments: An Interlaboratory  
756 Comparison. *Environ Sci Technol* 2010, **44**(24): 9405-9412.

- 757  
758 71. Stedmon CA, Bro R. Characterizing dissolved organic matter fluorescence with parallel  
759 factor analysis: a tutorial. *Limnol Oceanogr-Meth* 2008, **6**: 572-579.  
760  
761 72. Coble PG. Marine optical biogeochemistry: The chemistry of ocean color. *Chem Rev*  
762 2007, **107**(2): 402-418.  
763  
764 73. Gasol JM, Morán XAG. Flow cytometric determination of microbial abundances and its  
765 use to obtain indices of community structure and relative activity. In: McGenity TJ,  
766 Timmis KN, Nogales B (eds). *Hydrocarbon and Lipid Microbiology Protocols*. Springer:  
767 Berlin, Germany, 2015, pp 159-187.  
768  
769 74. Calvo-Díaz A, Morán XAG. Seasonal dynamics of picoplankton in shelf waters of the  
770 southern Bay of Biscay. *Aquatic Microbial Ecology* 2006, **42**(2): 159-174.  
771  
772 75. Gundersen K, Orcutt KM, Purdie DM, Michaels AF, Knap AH. Particulate organic carbon  
773 mass distribution at the Bermuda Atlantic Time-series Study (BATS) site. *Deep-Sea Res II*  
774 2001, **48**: 1697-1718.  
775  
776
